1 **The dually localized EF-hand domain-containing protein TgEFP1 regulates the lytic**  
2 **cycle of *Toxoplasma gondii***

3 Noopur Dave, Kaice LaFavers, Gustavo Arrizabalaga \*

4 Department of Pharmacology and Toxicology

5 Indiana University School of Medicine, Indianapolis, Indiana, USA.

6 \*Address correspondence to Gustavo Arrizabalaga, [garrizab@iu.edu](mailto:garrizab@iu.edu)

## 7 **ABSTRACT**

8       The propagation of the obligate intracellular parasite *Toxoplasma gondii* is tightly  
9 regulated by calcium signaling. However, the mechanisms by which calcium homeostasis  
10 and fluxes are regulated in this human pathogen are not fully understood. To identify  
11 *Toxoplasma*'s calcium homeostasis network, we have characterized a novel EF-hand  
12 domain-containing protein, which we have named TgEFP1. We have determined that  
13 TgEFP1 localizes to a previously described compartment known as the plant-like vacuole  
14 or the endo-lysosomal compartment (PLV/ELC), which harbors several proteins related  
15 to ionic regulation. Interestingly, partial permeabilization techniques showed that TgEFP1  
16 is also secreted into the parasitophorous vacuole (PV), within which the parasite divides.  
17 Ultrastructure expansion microscopy confirmed the unusual dual localization of TgEFP1  
18 at the PLV/ELC and the PV. Furthermore, we determined that the localization of TgEFP1  
19 to the PV, but not to the PLV/ELC, is affected by disruption of Golgi-dependent transport  
20 with Brefeldin A. Knockout of TgEFP1 results in faster propagation in tissue culture,  
21 hypersensitivity to calcium ionophore-induced egress, and premature natural egress.  
22 Thus, our work has revealed an interplay between the PV and the PLV/ELC and a role  
23 for TgEFP1 in the regulation of calcium-dependent events.

24

25 **Keywords:** *Toxoplasma*, EF-hand, calcium, egress, vacuole

26

## 27 1. INTRODUCTION

28 Calcium is a ubiquitous second messenger that regulates essential cell functions,  
29 including gene expression, protein secretion, metabolism, and apoptosis in various  
30 mammalian cell types [1]. Due to the crucial role that calcium plays in these different  
31 cellular functions, calcium levels are highly regulated, and localized calcium fluxes have  
32 been shown to regulate organelle-specific functions, including oxidative metabolism at  
33 the mitochondrial matrix and gene expression in the nucleus [1,2]. Several intracellular  
34 homeostatic mechanisms are used to regulate cytoplasmic calcium levels under resting  
35 and non-resting conditions, including activation of calcium-sensing and conducting  
36 proteins, which leads to the release or uptake of calcium by major calcium reservoirs  
37 within the cell or from the extracellular milieu [1].

38 Not surprisingly, calcium is also an important second messenger that regulates  
39 functions essential to the growth cycle of many eukaryotic human pathogens, including  
40 the protozoan parasite *Toxoplasma gondii* [3]. *T. gondii* infects a third of the human  
41 population and can cause severe disease in the immunocompromised and those infected  
42 congenitally [4,5]. A significant portion of this parasite's pathogenesis is due to the lytic  
43 nature of its propagation cycle. As an obligate intracellular parasite, *T. gondii* needs to be  
44 inside of a cell to divide, and it propagates by repeating cycles of host cell attachment,  
45 active invasion, and egress. Previous studies have shown that calcium plays a key role  
46 in regulating key steps of the *T. gondii* lytic cycle. Specifically, parasite-specific proteins  
47 needed for attachment and invasion are secreted in a calcium-dependent manner [3].  
48 Furthermore, there is a temporal increase in calcium levels in the host cell, the

49 parasitophorous vacuole (PV) within which the parasites reside and divide, and the  
50 parasite cytosol, which regulates the timing of egress [6].

51 Extensive work has been conducted to understand calcium signaling in the parasite  
52 [6,7]. However, the mechanisms responsible for regulating calcium homeostasis and  
53 sensing are not thoroughly understood. The biggest calcium reservoir in mammalian cells  
54 is the endoplasmic or sarcoplasmic reticulum (ER/SR) [2]. The uptake of calcium from the  
55 ER/SR is regulated by the sarcoendoplasmic reticulum  $\text{Ca}^{2+}$ -ATPase (SERCA) [1,2]. The  
56 release of calcium from the ER/SR is regulated by 1,4,5-triphosphate receptors (IP3R)  
57 and ryanodine receptors (RyR). Similarly, the ER of *T. gondii* has been implicated in  
58 calcium storage and calcium release. Nonetheless, while the parasite is sensitive to IP3,  
59 an IP3 receptor has not been identified [6,8].

60 Other intracellular calcium stores in eukaryotic cells include the mitochondria,  
61 nucleus, and secretory granules in excitatory cells [2], but to date, no evidence exists for  
62 these organelles playing a role in calcium fluxes in *T. gondii*. Extensive work from our lab  
63 and others on a unique compartment known as the plant-like vacuole or the endosome-  
64 like compartment (PLV/ELC) determined that this organellar network harbors several ion  
65 binding and/or conducting proteins, including the sodium-proton exchanger 3 (TgNHE3),  
66 aquaporin (TgAQP1) and a vacuolar-pyrophosphatase (TgVP1) [9,10]. Furthermore, a  
67 calcium-proton exchanger has been predicted to localize to the PLV/ELC, suggesting that  
68 this compartment may play a role as a calcium store in the parasite [11]. However, little is  
69 known about the function of the PLV/ELC in parasite calcium homeostasis.

70 Interestingly, work from our lab and others has shown that the parasitophorous  
71 vacuole (PV) within which the parasite resides may also play a key role in calcium

72 regulation [3,12]. Through a forward genetic selection for parasites resistant to the effects  
73 of calcium ionophores, we identified TgGRA41, a protein secreted into the PV during  
74 parasite intracellular growth. Parasites lacking TgGRA41 exhibit abnormal division,  
75 calcium dysregulation, and premature egress from the host [12]. We have now identified  
76 a novel EF-hand domain-containing protein, TgEFP1, which is present in the PV during  
77 intracellular growth. Like TgGRA41, disruption of this protein affects the timing of egress  
78 and the rate of parasite propagation. Interestingly, we show that TgEFP1 is predominantly  
79 present within the PLV/ELC, suggesting an interplay between this compartment and the  
80 PV. Important, this work suggests that the PV and PLV/ELC collaborate in the control of  
81 the parasite propagation cycle through the regulation of ionic homeostasis.

## 82 2. MATERIALS AND METHODS

### 83 *Host Cell and Parasite Maintenance*

84 All parasite strains were continuously passed through Human Foreskin Fibroblast  
85 Cells (HFF-1; ATCC Catalog #: SCRC-1041™). Cultures were maintained Dulbecco's  
86 Modified Eagle's Medium (Thermo Fischer Scientific Catalog #:11885084) supplemented  
87 with 10% heat-inactivated Fetal Bovine Serum (FBS; Corning® Catalog # 35-015-CV),  
88 100 mg streptomycin/100 U penicillin per mL, and 2 mM L-glutamine. Cultures were  
89 grown in a humidified incubator at 37°C and 5% CO<sub>2</sub>. The parental strain used is the RH  
90 strain lacking genes encoding hypoxanthine-xanthine-guanine  
91 phosphoribosyltransferase (*HXGPRT*) and *Ku80* (RHΔ*ku80*Δ*hxgprt*) [13,14]. Parasite lines  
92 under pyrimethamine selection were cultured in DMEM supplemented with dialyzed FBS  
93 (Corning® Catalog # 35-071-CV. Parasites were selected with pyrimethamine (1mM),  
94 mycophenolic acid (50 mg/mL) and/or xanthine (50 mg/mL). Stock pyrimethamine and  
95 mycophenolic acid were prepared in ethanol, while xanthine was prepared in water. All  
96 drugs were purchased from Sigma-Aldrich.

### 97 *Generation of transgenic parasite lines*

98 To generate the TgEFP1-HA parasite strain, a double homologous recombination  
99 strategy was used to add a triple hemagglutinin (HA) epitope tag to the endogenous gene.  
100 A fragment of homology upstream of the TgGT1\_255660 stop codon was cloned into the  
101 PacI site of the pLIC-3xHA-DHFR vector by ligase-independent cloning. All primers used  
102 in this study are listed in supplemental Table S1. The resulting vector was linearized with  
103 SacI restriction enzyme and transfected into RHΔ*ku80*Δ*hxgprt* parasites. Transfected

104 parasites were selected with pyrimethamine, and clones were established by serial  
105 dilution.

106 To generate the TgEFP1 knockout parasites, the TgEFP1-HA expressing strain was  
107 transfected with plasmids expressing Cas9-GFP and either of two guide RNAs (sgRNA 1  
108 and 2). These vectors were generated by mutating the sgRNA site in the pSag1-Cas9-  
109 U6-sgUPRT-HXG plasmid [14] using the Q5 Site-Directed Mutagenesis Kit (NEB). The two  
110 guide RNAs were designed to target TgEFP1 at either of the predicted EF-hand domains  
111 using the online E-CRISP tool (<http://www.e-crisp.org/E-CRISP/>). Parasites were co-  
112 transfected with either of the sgRNA expressing vectors and a donor template consisting  
113 of the gene encoding HXGPRT flanked by fragments of homology to regions upstream  
114 and downstream of each sgRNA. Stable lines were established through selection with  
115 MPA and xanthine. Serial dilution was used to establish clones, and one from each of the  
116 two populations was chosen for this work: TgEFP1-KO clone 1 from those transfected  
117 with sgRNA1 and TgEFP1-KO clone 2 from the sgRNA 2 transfection. Disruption of  
118 TgEFP1 in both clones was confirmed by western blot and IFA.

119 TgEFP1-KO Clone A was generated in the RH $\Delta ku80\Delta hxgp1$  strain using the same  
120 CRISPR/Cas9 plasmid and donor template as for TgEFP-KO clone 1. Insertion of the  
121 template into the *TgEFP1* locus was confirmed by PCR. To generate a plasmid for  
122 complementation, we amplified the *TgEFP1* coding sequence (CDS) from genomic DNA  
123 extracted from the parental strain and a region of 1100 base pairs upstream of the  
124 TgEFP1 start codon, which would contain the promoter and 5'UTR of the gene. Both  
125 amplicons were cloned into the pLIC-3xHA-DHFR vector using In-Fusion HD Cloning to  
126 obtain the plasmid 5'UTR-TgEFP1-3xHA-DHFR-HXGPRT. In-Fusion® Cloning was used

127 on this plasmid to generate the signal peptide deletion mutant (SP Del), in which residues  
128 2-27 of TgEFP1 were deleted. In-Fusion® Cloning was also used to generate the D97A  
129 and D129A mutant versions of TgEFP1. The TgEFP1 WT and mutant complementation  
130 plasmids were used as templates to amplify cassettes that include *efp1*-EFP1-HA and  
131 the HXGPRT selection maker, which were transfected into the TgEFP1-KO Clone A  
132 strain. To direct integration of the complementation cassettes into the 5'UTR of the  
133 disrupted *KU80* gene in the knockout strain, we generated *plapSag1-Cas9-U6-*  
134 *sgKU80.5'UTR-HXGR-HXG*, which expresses CAS9 and a sgRNA targeting *KU80*.  
135 TgEFP1-KO Clone A parasites were transfected with both the complementation cassettes  
136 and the *plapSag1-Cas9-U6-sgKU80.5'UTR-HXGR-HXG* plasmid. Parasites were  
137 selected with pyrimethamine, and clones were established through serial dilution. IFA  
138 was used to confirm the expression of TgEFP1 in the complemented strains.

### 139 ***Immunofluorescence assays and Western Blot***

140 Immunofluorescence assays (IFAs) and western blots were performed as previously  
141 described [15-17]. For the western blots, extracellular parasite protein extract was made  
142 from parasites allowed to naturally undergo egress. Intracellular parasite extract was from  
143 HFFs infected for 30 hours. For this study, the primary antibodies used were monoclonal  
144 anti-HA rabbit and/or anti-SAG1 mouse at 1:5000, followed by goat anti-rabbit and/or goat  
145 anti-mouse conjugated to horseradish peroxidase (HRP) at 1:10,000 in non-fat dry milk  
146 in TBST (Tris buffer saline solution, 0.1% Tween 20), as previously described [15].

147 For immunofluorescence, assays of extracellular parasites were attached to poly-  
148 lysine treated glass coverslips as previously described [17]. For immunofluorescence  
149 assays of intracellular parasites, host cells were grown on glass coverslips and



150 subsequently infected with parasites at an MOI of 2. Samples were stained with  
151 antibodies against organelle-specific primary antibodies (1:1000), including mouse anti-  
152 TgATREX (apicoplast), mouse anti-TgSERCA (ER), mouse anti-F1 $\beta$ -ATPase  
153 (mitochondrion), mouse anti-TgROP6 (rhoptries), mouse anti-TgCPL (VAC), guinea pig  
154 anti-TgNHE3 (PLV), rat anti-TgSORTLR (Golgi), and mouse anti-acetylated tubulin. In  
155 addition, to detect HA-tagged proteins, we used rabbit anti-HA antibodies (1:1000).  
156 Secondary antibodies used were Alexa-Fluor 594 anti-Mouse (1:2000), Alexa-Fluor 748  
157 anti-mouse (1:2000), Alexa-Fluor 568 anti-Guinea pig (1:2000), Alexa-Fluor 488 anti-  
158 Rabbit, Alexa-Fluor 568 anti-guinea pig, and Alexa Fluor 647 anti-rat (1:2000).

### 159 ***Brefeldin A (BFA) Experiments***

160 Host cells were grown on 15 mm glass coverslips in 24-well plates and subsequently  
161 infected with freshly lysed parasites at an MOI of 2. After 24 hours, samples were treated  
162 with 0, 1, 2.5, or 5 mM BFA in HBSS for either 15 minutes, 30 minutes, or 1 hour. Samples  
163 were fixed at appropriate time points in 4% paraformaldehyde/1X PBS pH 7.4 for 15  
164 minutes at room temperature. IFA was performed as described above.

### 165 ***Ultrastructure Expansion Microscopy***

166 Host cells were seeded on 15 mm coverslips in a 24-well plate, infected with parasites  
167 for 18 hours, and fixed. After fixation, ultrastructure expansion microscopy protocol was  
168 used to expand and image samples as outlined in a previous study [18]. Level of  
169 expansion was determined by measuring the diameter of the gel after expansion and  
170 comparing it to the diameter of the coverslip. Samples were stained with the following  
171 primary antibodies rabbit: anti-HA (1:500), mouse anti-TgGRA5 (1:250), and/or mouse  
172 anti-acetylated tubulin. Subsequently, samples were stained with the following secondary

173 antibodies: goat anti-Mouse Alexa-Fluor 594, goat anti-mouse Alexa-Fluor 647, and/or  
174 goat anti-rabbit Alexa-Fluor 488. All samples were also co-stained with Alexa-Fluor 405  
175 NHS-ester to stain for protein density.

### 176 ***Phenotypic assays***

177 All phenotypic assays were performed as previously described [15,17,19]. In brief, for  
178 plaque assays, HFFs grown in 12-well plates were infected with 500 freshly lysed  
179 parasites and allowed to grow for 5-6 days, after which samples were fixed with methanol  
180 and stained with crystal violet. Imaging of samples was done using the Protein Simple  
181 FluorChem M system imager, and the plaque area clearance was quantified using ImageJ  
182 and the ColonyArea plugin [20]. For the egress assays, infected HFFs were treated with  
183 0, 0.1, 0.5, or 1  $\mu$ M of A23187 prepared in HBSS buffer (Gibco) for 2 minutes at 37°C.  
184 Samples were then fixed with methanol and stained with Hema3 Manual Staining System  
185 (Fisher Scientific). The number of intact and lysed vacuoles was recorded across all cell  
186 lines using a light microscope. For doubling assays, approximately  $2 \times 10^4$  freshly lysed  
187 parasites were allowed to invade HFFs for 2 hours, after which cultures were washed 5  
188 times with warm media to eliminate parasites remaining outside cells. Cultures were then  
189 grown for 24 and 30 hours before fixation with methanol and staining with Hema3 Manual  
190 Staining System (Fisher Scientific). For each sample, 50 vacuoles were randomly  
191 selected, and the number of parasites per vacuole was recorded. All phenotypic assays  
192 were conducted in biological and experimental triplicate statistically analyzed using  
193 ANOVA followed by student t-tests assuming equal variance.

194 ***Statistical Analysis***

195 All statistical analysis was performed with Microsoft Excel. All data were analyzed  
196 using Student's T-test to evaluate statistical significance.

## 197 **3. RESULTS**

### 198 **3.1. TgEFP1-HA is localized to the PLV/ELC and the parasitophorous vacuole**

199 To identify proteins involved in calcium regulation that might be secreted, we  
200 searched the *Toxoplasma gondii* database (ToxoDB) for proteins with both EF-hands and  
201 signal peptides. In this manner we identified TgGT1\_255660, TgGT1\_\_293760, and  
202 TgGT1\_227800. User comments in ToxoDB indicate that TgGT1\_293760 and  
203 TgGT1\_227800 localized to the Golgi and the IMC sutures, respectively. Accordingly, we  
204 focused our investigation on the uncharacterized TgGT1\_255660, a 149 amino acid  
205 protein that we refer to as TgEFP1. The online tools SignalP-5.0 and Scan Prosite predict  
206 an N-terminal signal peptide between amino acids 1 and 27 and two canonical C-terminal  
207 EF-hand domains between the amino acids 84 to 119 and 119 to 149 (Fig. 1A) [21-23]. To  
208 identify the localization and expression pattern of TgEFP1, we introduced a C-terminal  
209 triple hemagglutinin (3xHA) epitope tag along with the selectable DHFR marker at the  
210 endogenous locus using double homologous recombination (Fig. 1A). Western blot  
211 analysis probing with anti-HA primary antibody showed a specific band in the TgEFP1-  
212 HA lysate at the predicted 19 kilodaltons (kDa) size. Western blot analysis also showed  
213 that TgEFP1-HA was present in both intracellular and extracellular parasites at similar  
214 levels (Fig. 1B). Immunofluorescence assay (IFA) probing with anti-HA primary antibody  
215 showed that TgEFP1-HA localized to an internal compartment within the parasite and  
216 around the parasite cell body (Fig. 1C). IFA analysis of TgEFP1-HA parasites probing  
217 with anti-HA along with an array of organelle-specific antibodies showed that TgEFP1-  
218 HA only co-localized with the plant-like vacuole or endosomal-like compartment  
219 (PLV/ELC) marker TgNHE3 (Fig. 1D). In contrast, TgEFP1-HA did not co-localize with

220 other organelle markers, including TgROP6 at the rhoptries, TgCPL at the lysosome-like  
 221 vacuolar compartment (VAC), TgF $\beta$ -ATPase at the mitochondrion, TgATREX at the  
 222 apicoplast, and TgSERCA at the endoplasmic reticulum (Fig. 1D). Altogether, TgEFP1-  
 223 HA is expressed in both intracellular and extracellular parasites and localizes to a discrete  
 224 area of the parasite where it co-localizes with TgNHE3.

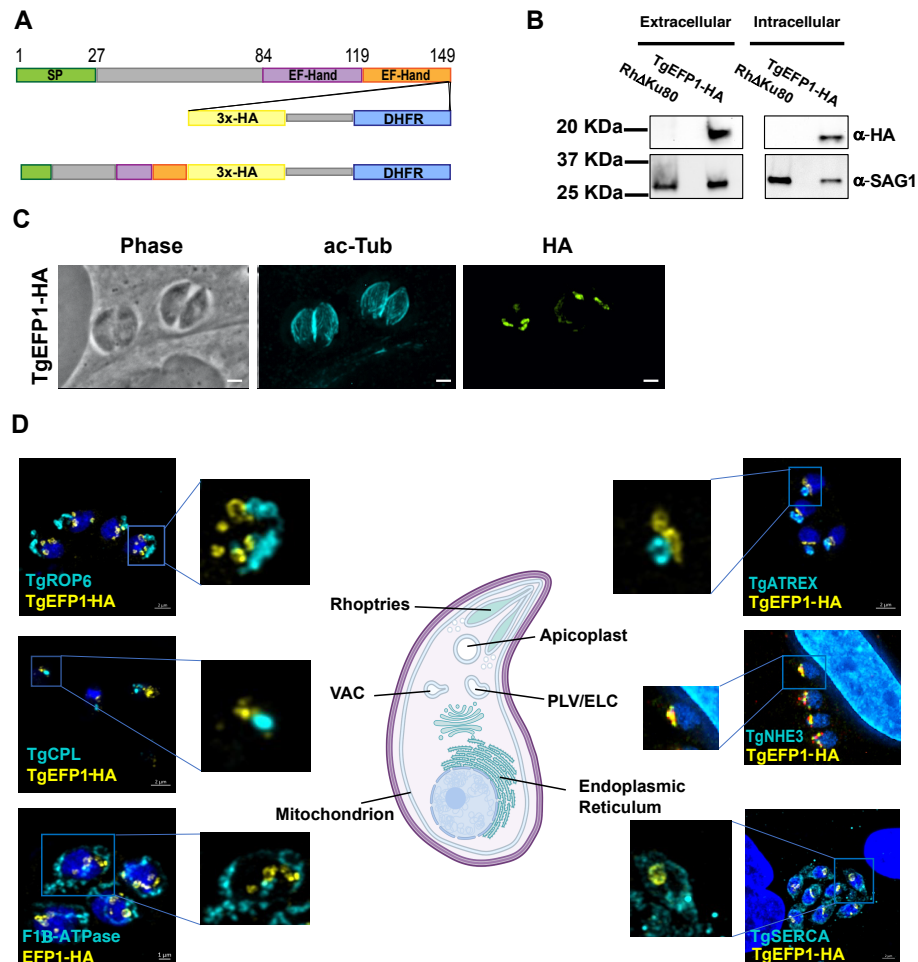

225 **Figure 1. TgEFP1 expression and localization in intracellular and extracellular parasites.** (A) Diagram  
 226 of TgGT1\_255660 (TgEFP1), which contains an N-terminal signal peptide (green box) along with two  
 227 consecutive C-terminal EF-hand domains (purple and orange boxes). Double homologous recombination  
 228 was used to introduce a triple hemagglutinin tag (3xHA, yellow box) and a DHFR selectable marker (DHFR,  
 229 blue box) to the C-terminus of TgEFP1. (B) Western blot analysis of protein extract from both intracellular  
 230 and extracellular parasites of the parental and the TgEFP1-HA strains. Blots were probed for HA (top panel)  
 231 and for TgSAG1 as a loading control (bottom panel). (C) IFA of intracellular parasites of the TgEFP1-HA  
 232 strain probing with anti-HA (green) and anti-acetylated-tubulin (cyan). (D) IFA of intracellular TgEFP1-HA  
 233 parasites using anti-HA antibodies (green) and antibodies against known organellar markers (cyan),  
 234 including ROP 6 for the rhoptries, TgCPL for the VAC, F1B-ATPase for the mitochondrion, TgATREX for  
 235 the apicoplast, TgNHE3 for the PLV, and TgSERCA for the ER (Image created with BioRender.com). Scale  
 236 bars = 2  $\mu$ m.

237 Previous studies have shown that in extracellular parasites, the lysosome-like  
238 compartment named the VAC and other endosomal compartments, including the  
239 PLV/ELC, condense into one punctate region at the trans-Golgi network of the parasite  
240 [24]. The VAC then exhibits dynamic fragmentation in intracellular parasites, where it  
241 separates from the trans-Golgi network and fragments into smaller vesicles [24]. To  
242 identify if the compartment containing TgEFP1 also exhibits the same dynamic pattern,  
243 we performed IFA of intracellular and extracellular parasites probing for the trans-Golgi  
244 network marker TgSortilin-like receptor (TgSOTRTL), the known PLV/ELC marker  
245 TgNHE3, and TgEFP1-HA (Fig. 2A). in intracellular parasites the signals from all three  
246 markers appear separate from each other, where TgEFP1-HA is abutting to TgSORTLR  
247 and co-localizes with TgNHE3 (Fig. 2A, top row). However, in extracellular parasites,  
248 TgEFP1-HA co-localizes with TgSORTLR, TgNHE3, and TgEFP1-HA signals (Fig. 2A,  
249 bottom row). Thus, like other parasite endosomal compartments, the compartment  
250 harboring TgEFP1 and NHE3 exhibits dynamic events that include coalescence in  
251 extracellular parasites.

252

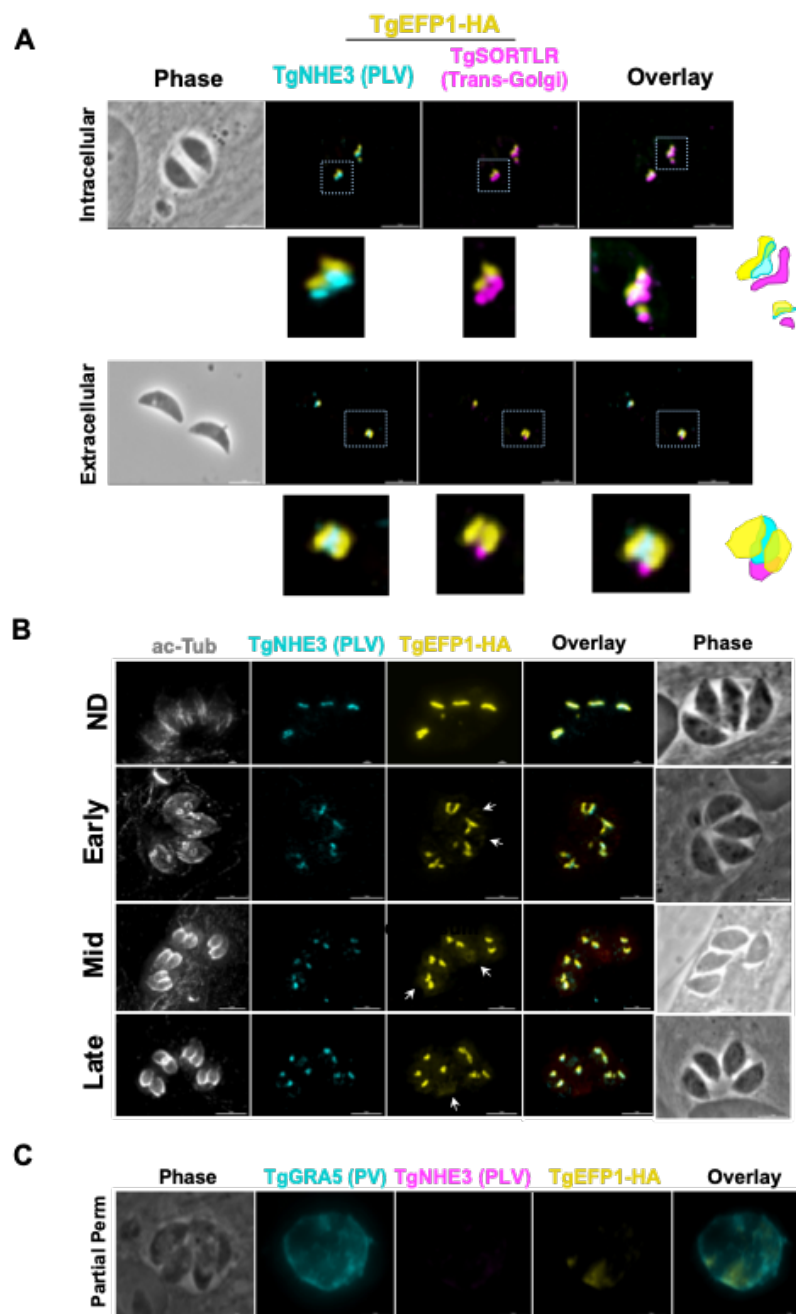

253 **Figure 2. Dynamics of TgEFP1-HA localization during division. (A)** IFA of intracellular and extracellular  
 254 TgEFP1-HA parasites probed with HA antibodies (yellow), the PLV/ELC marker TgNHE3 (cyan), and the  
 255 trans-Golgi marker-TgSORTLR (magenta). White box marks area zoomed on in the images below. The  
 256 diagram on the right shows the relative position of the three staining patterns. **(B)** IFA of intracellular  
 257 parasites using antibodies against acetylated tubulin (ac-Tub), TgNHE3, and the HA epitope tag (yellow).  
 258 Acetylated tubulin was used to categorize the stage of division as either non-dividing (ND), early, mid or  
 259 late. **(C)** IFA of intracellular TgEFP1-HA parasites using partial permeabilization stained for the  
 260 parasitophorous vacuole (PV) marker TgGRA5 (cyan), HA (yellow), and TgNHE3. The lack of TgNHE3  
 261 staining confirms that only the host and parasitophorous vacuole membranes were permeabilized but not  
 262 that of the parasite. Scale bar = 5 mm.

263 Closer observation of immunofluorescence images showed that the TgEFP1-HA  
264 localization pattern differed between different vacuoles. This could be due to dynamic  
265 localization during parasite division. *T. gondii* divides through a process called  
266 endodyogeny, where daughter parasites form within the mother parasite. Through this  
267 process, some organelles are inherited from the mother parasite, while other organelles  
268 are synthesized *de novo* within the daughter parasites [25]. To investigate whether the  
269 difference in TgEFP1-HA localization pattern between vacuoles was due to differences in  
270 intracellular division stages and to understand the biogenesis of its compartment, we  
271 performed IFA of intracellular parasites staining for TgEFP1 and for acetylated-tubulin,  
272 which allows us to monitor parasite division. In non-dividing parasites, TgEFP1-HA  
273 staining starts as a u-shaped pattern, one per parasite (Fig. 2B, top row). During the early  
274 division stages, the u-shaped pattern starts to distribute amongst the two daughter cells  
275 (Fig. 2B, second row). Eventually, the u-shaped pattern turns into two puncta, one per  
276 daughter parasite in mid and late division stages (Fig. 2B, third and bottom row). This  
277 showed that the variation in the TgEFP1-HA localization pattern is attributed to the  
278 dynamic pattern of its compartment during division. Furthermore, we showed that the  
279 TgEFP1-HA compartment, which appears to be the PLV/ELC, is inherited from the mother  
280 parasite.

281 Interestingly, during inspection of IFAs, we noted a significant amount of TgEFP1-HA  
282 signal outside of the parasites, a pattern that was more prominent in mid and late division  
283 stages (Fig. 2B, white arrow). This suggests that TgEFP1 might also be present within  
284 the parasitophorous vacuole (PV). To confirm this observation, we monitored the  
285 localization of TgEFP1 by IFA from cultures permeabilized with 0.001% digitonin, which



286 is known to be sufficient to permeabilize the host cell and PV membranes, but not the  
287 parasite plasma membrane [17]. Besides anti-HA antibodies to monitor TgEFP1, we  
288 stained the partially permeabilized cultures for GRA5, which is a known marker for the  
289 PV, and for TgNHE3, to confirm that the parasites remained intact. While TgNHE3 is not  
290 detectable in partially permeabilized cultures, we can clearly detect both TgGRA5 and  
291 TgEFP1 (Fig. 2C). Altogether, TgEFP1-HA has a unique dual localization at the PLV/ELC  
292 and the PV.

### 293 **3.2. Monitoring of TgEFP1 localization by Ultrastructure Expansion Microscopy**

294 As to more precisely observe the localization and dynamics of TgEFP1 in intracellular  
295 parasites, we employed Expansion Microscopy (U-ExM), which allows for higher  
296 resolution of cellular structures and protein localization [18]. Intracellular parasites were  
297 treated according to the U-ExM protocol to expand samples [18] and stained for TgEFP1-  
298 HA and TgGRA5 using antibodies and for protein density using NHS-ester. Following  
299 expansion the size of the samples increased five-fold, which revealed a high level of detail  
300 in not only the localization of TgEFP1-HA but also the dynamic fragmentation and  
301 biogenesis of the compartment within which it localizes (Fig. 3). U-ExM images show that  
302 TgEFP1-HA localizes to a discrete compartment, as seen in IFAs of non-expanded  
303 samples (Fig. 3A). Additionally, TgEFP1-HA co-localized with TgGRA5 at the PV in  
304 expanded samples, confirming the results described above (Fig. 3A). TgGRA5 is also  
305 detected within the parasite, which could be the dense granules from which this protein  
306 is secreted into the PV. Furthermore, we were able to observe TgEFP1-HA staining in the  
307 non-dividing, early, mid, and late division stages by co-staining with acetylated tubulin  
308 (Fig. 3B). In non-dividing parasites, TgEFP1-HA staining appears as puncta concentrated

309 at a focal area. During the early and mid-division stages, we see that TgEFP1-HA starts  
310 to distribute amongst the two daughter parasites. Eventually, during late division stages,  
311 TgEFP1-HA staining presents as two individual concentrated areas, one per daughter  
312 parasite (Fig. 3B).

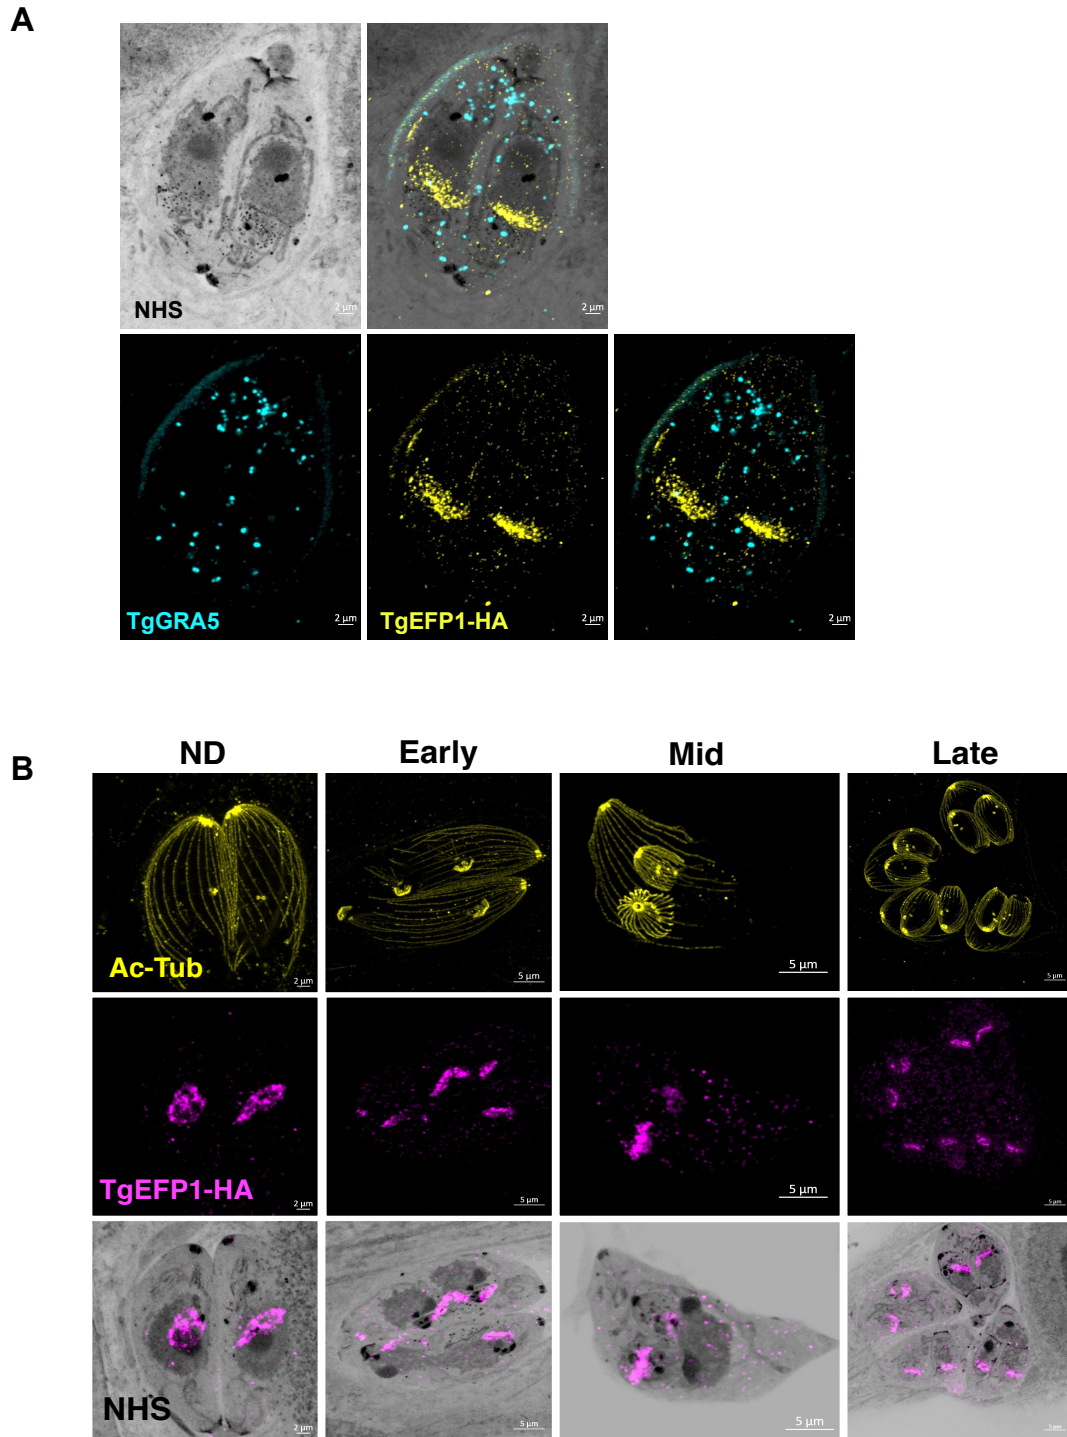

313 **Figure 3. Ultra-structure expansion (U-ExM) microscopy of TgEFP1-HA intracellular parasites. (A)**  
314 Intracellular TgEFP1-HA parasites were processed for U-ExM and stained with NHS-ester (inverted  
315 grayscale), TgGRA5 (cyan), and TgEFP1-HA (yellow). **(B)** Images show U-ExM of intracellular TgEFP1-  
316 HA parasites stained with NHS-ester (inverted grayscale), acetylated-tubulin (ac-Tub, yellow), and  
317 TgEFP1-HA (magenta). The stages of parasite division were categorized as non-dividing (ND), early,  
318 mid, and late using Ac-Tub as a guide. The bottom row shows the overlay of NHS-ester and TgEFP1-HA. Scale  
319 = 2 μm.

320 **3.3. Brefeldin A (BFA) treatment on intracellular parasites depletes PV localization**  
321 **but does not affect PLV/ELC localization of TgEFP1-HA**

322 Trafficking of secretory proteins to endosomal compartments in *T. gondii* is  
323 dependent on motor proteins and canonical vesicle transport through the Golgi complex  
324 [26]. The regulation of secretory protein trafficking through the Golgi-complex to the  
325 endosomal compartments was found to be critical for protein localization to the secretory  
326 organelles as well as for the function of those proteins [26]. To investigate the trafficking  
327 of TgEFP1-HA to the PV and its location within the parasite, intracellular parasites were  
328 treated with BFA to block ER to Golgi transport, which would inhibit the transport of  
329 proteins to endosomal compartments (Fig. 4A). IFAs of BFA treated and untreated  
330 parasites were stained with anti-HA antibodies to monitor TgEFP1-HA localization, along  
331 with acetylated-tubulin to determine the stage of intracellular division (Fig. 4B, C).  
332 Additionally, the trans-Golgi network protein TgSORTLR was used to confirm the effect  
333 of BFA, as treatment inhibits TgSORTLR trafficking to the trans-Golgi network [19]. IFA of  
334 intracellular parasites treated with 5 mM BFA for 15 minutes showed that parasites are  
335 still expressing TgSORTLR and TgEFP1-HA at intracellular compartments that are  
336 abutting each other (Fig. 4B, top row). When intracellular parasites were treated with 5  
337 mM of BFA for 1 hour, TgSORTLR became undetectable, while the intra-parasitic foci of  
338 the TgEFP1-HA signal remained. Interestingly, we observed little to no TgEFP1-HA in the  
339 PV of vacuoles in later division stages (Fig. 4B, bottom row). In parallel, we treated  
340 parasites with 0, 1, 2.5, and 5 mM of BFA for 30 minutes. Once again, IFA of treated  
341 parasites staining with acetylated-tubulin, TgSORTLR, and TgEFP1-HA (Fig. 4C).  
342 Parasites treated with 0 and 1 mM of BFA are still expressing TgSORTLR at the trans-

343 Golgi network and TgEFP1-HA within the parasite with some staining at the PV (Fig. 4C,  
344 top and second row). With increasing BFA concentration to 2.5 and 5 mM, the TgSORTLR  
345 signal is diffuse or no longer present. However, TgEFP1-HA expression within the  
346 parasite remains with less to no accumulation at the PV (Fig. 4C, third and bottom row).  
347 Altogether, this showed that transport of TgEFP1-HA to the PV is Golgi-dependent, while  
348 transport of TgEFP1-HA to its intra-parasitic localization is not dependent on Golgi-  
349 transport.

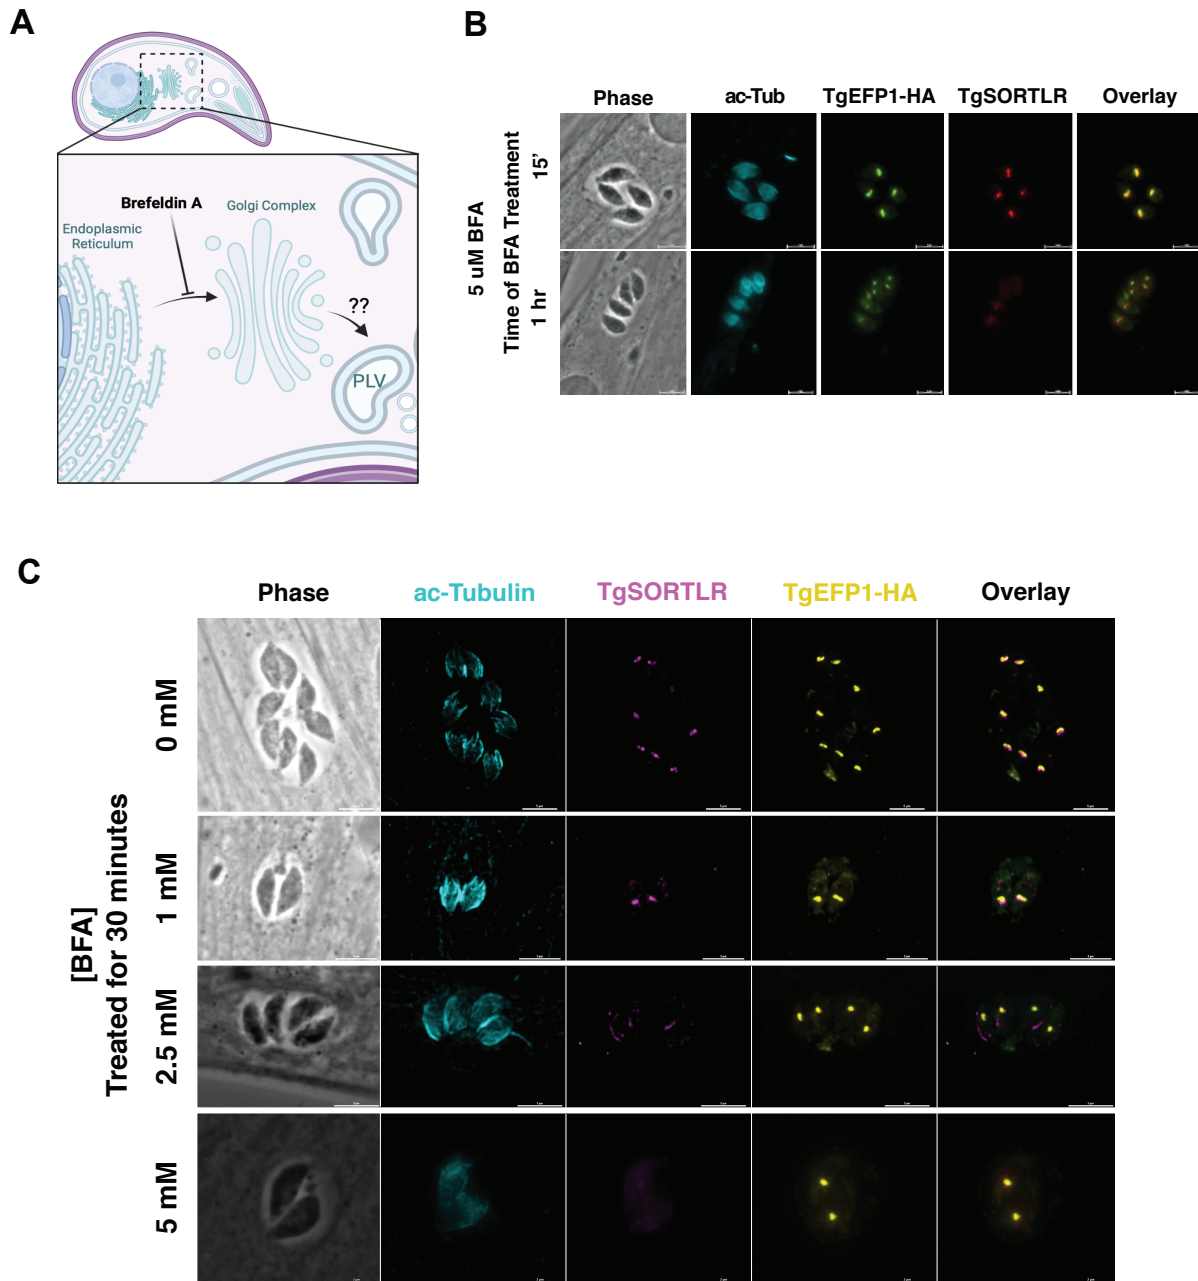

350 **Figure 4. Effect of Brefeldin A treatment on TgEFP1-HA localization in intracellular parasites.** (A)  
 351 Diagram showing the effect of Brefeldin A (BFA) on protein transport and localization (created with  
 352 BioRender.com). BFA inhibits vesicular fusion and transport of proteins from ER to the Golgi complex. (B)  
 353 IFA of intracellular parasites treated with 5 mM BFA for 15 minutes (top row) or 1 hour (bottom row) stained  
 354 for TgSORTLR (red), TgEFP1-HA (green), acetylated-tubulin (cyan). (C) IFA of intracellular parasites  
 355 treated with a gradient concentration of BFA from 0 mM to 5 mM for 30 minutes and stained as in A. Scale  
 356 bar = 5  $\mu$ m.

### 357 **3.4. TgEFP1 knockout (TgEFP1-KO) parasites have a faster lytic cycle**

358 CRISPR/Cas9 was used to knockout TgEFP1 in the TgEFP1-HA expressing  
359 parasites to generate TgEFP1-KO parasites [13]. TgEFP1-HA parasites were co-  
360 transfected with a plasmid encoding Cas9 and one of two guide RNAs targeting TgEFP1  
361 (sgRNA 1 and 2), along with a donor template consisting of a selectable marker flanked  
362 by regions of homology flanking the cut site in the *TgEFP1* locus (Fig. 5A). sgRNA 1  
363 targeted the first EF-hand domain, while sgRNA 2 targeted the second EF-hand domain  
364 (Fig. 5A). In this manner, we established two independent mutant clones, where clone 1  
365 was generated using sgRNA 1 while clone 2 was generated using sgRNA 2. Western blot  
366 of protein extracts from these clones showed that they no longer express TgEFP1-HA  
367 (Figure 5A). Protein lysate of TgEFP1-HA and parental RH $\Delta$ Ku80 parasites acted as  
368 positive and negative controls, respectively. IFA shows that the tagged cell lines TgEFP1  
369 KO clones 1 and 2 are no longer expressing TgEFP1-HA but are still expressing TgNHE3  
370 in the correct localization (Fig. 5B).

371

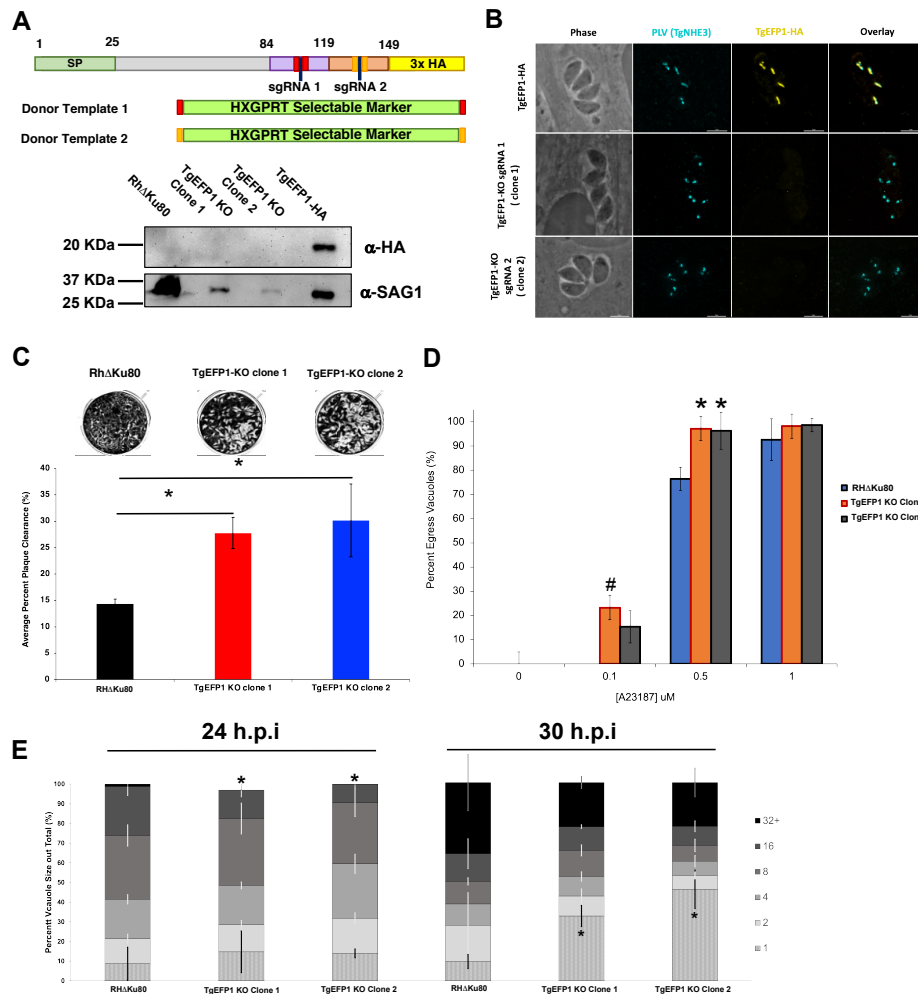

372 **Figure 5. Generation and phenotypic analysis of TgEFP1 knockout (TgEFP1-KO) parasites.** (A)  
 373 Diagram showing the CRISPR/Cas9 strategy used to knockout (ko) TgEFP1 in the TgEFP1-HA strain. Two  
 374 guide-RNAs (sgRNA 1 and sgRNA 2) were designed to target each of the EF-hand domains of TgEFP1.  
 375 Two donor templates (1 and 2) were designed to contain the HXGPRT selectable marker flanked by regions  
 376 of homology to the targeted area (red and orange boxes). The vector coding Cas9 and sgRNA1 and the  
 377 donor template 1 were co-transfected to generate TgEFP1 Clone 1 and sgRNA2, and the donor template  
 378 2 were co-transfected to generate TgEFP1 Clone 2. Below the diagram is a western blot of protein extract  
 379 from the parental RHΔKu80 strain, the two independent TgEFP1-KO clones, and the TgEFP1-HA parasites  
 380 probed for either HA or SAG1 (loading control). (B) IFA of intracellular parasites of the TgEFP1-HA,  
 381 TgEFP1-KO clone 1, and TgEFP1-KO clone 2 strains probed for HA (yellow) and TgNHE3 (cyan). Scale  
 382 bar = 5 μm. (C) Representative images of plaque assays of RHΔKu80 and KO clones 1 and 2 grown for 5  
 383 days post-infection. The graph shows the quantification of plaque area clearance. (D) Intracellular parasites  
 384 of the three strains were treated with 0, 0.1, 0.5, or 1 μM of calcium ionophore-A23187 for 2 minutes,  
 385 and the percent of lysed vacuoles was calculated for each data point. (E) Doubling assays show that at 24  
 386 hours, there was a significantly lower number of 16 packs in comparison to parental and tagged parasites.  
 387 At 30 hours, TgEFP1-KO clones 1 and 2 had a significantly higher number of 1 pack in comparison to that  
 388 of parental and tagged parasites. For C to E n is 3 experimental replicates with experimental triplicates  
 389 each, error bars are standard deviation; \*p<0.05 and #p<0.01 based on Student's t-test.



390 While maintaining the parental and mutant strains, we observed that TgEFP1-KO  
391 clones 1 and 2 seemed to lyse through a monolayer of HFFs earlier than the parental  
392 parasites. To quantitate this effect, we performed plaque assays using the parental strain  
393 and the two TgEFP1-KO clones. For all phenotypic assays, we used Rh $\Delta$ *hxgprt* as the  
394 parental control as there was no statistical difference between this strain and the TgEFP1-  
395 HA line. Representative images of the plaque assays show that TgEFP1-KO clones 1  
396 and 2 have more clearance of the HFF monolayer than the parental parasites (Fig. 5C).  
397 Quantification of plaque area clearance using Image J software showed that the average  
398 percentage plaque area clearance for parental parasites was  $14.395\% \pm 0.875$ , while that  
399 of TgEFP1-KO clones 1 and 2 was significantly higher at  $27.79\% \pm 2.98$  and  $30.18\% \pm$   
400  $6.87$ , respectively (Fig. 5C).

### 401 **3.5. Parasites lacking TgEFP1 are more sensitive to ionophore induced egress**

402 The increase in cell clearance by the KO strains could indicate a rise in the  
403 efficiency or timing of any of the steps of the parasite lytic cycle. Previous studies have  
404 shown that calcium fluxes are critical for the regulation of these steps, including the timing  
405 of parasite egress during the lytic cycle [6]. As TgEFP1 is predicted to bind calcium via  
406 two C-terminal EF-hand domains, we investigated whether the observed faster lytic rate  
407 was due to perturbations in calcium-dependent events such as egress. For this purpose,  
408 intracellular parasites were treated with 0, 0.1, 0.5, or 1  $\mu$ M of the calcium ionophore  
409 A23187 for 2 minutes. For each treatment, we calculated the percentage of egressed  
410 vacuoles with respect to the no ionophore controls (Fig. 5D). At 0.1 mM of A23817 the  
411 parental strain did not exhibit any egress ( $0\% \pm 0$ ), while TgEFP1-KO clones 1 and 2  
412 showed  $23.262\% \pm 11.26$  and  $15.37\% \pm 6.64$  egressed vacuoles, respectively. When

413 parasites were treated with 0.5 mM, the trend continued where parental parasites, for  
414 which  $76.44\% \pm 4.84$  of vacuoles were ruptured, were undergoing less egress than KO  
415 clones 1 and 2, which showed  $97.21\% \pm 7.801$  and  $96.32\% \pm 7.610$  egress, respectively  
416 (Fig. 5D). This result shows that parasites lacking TgEFP1 are more sensitive to calcium  
417 ionophore treatment in comparison to the parental parasites.

418 Previously, we have shown that mutants that exhibit increased sensitivity to  
419 calcium ionophore-induced egress also show altered dynamics in natural egress, which  
420 could be observed by monitoring the sizes of vacuoles along time [12]. For this purpose,  
421 we tabulated the percentage of vacuoles of a particular size (i.e., number of parasites per  
422 vacuole) at 24 and 30 hours post-infection for the parental and KO strains. At 24 hours,  
423 TgEFP1 KO clones 1 and 2 had a significantly lower percentage of vacuoles with 16  
424 parasites ( $14.51\% \pm 3.40$  and  $9.35\% \pm 1.83$ , respectively) in comparison to the parental  
425 strain ( $24.93\% \pm 4.56$ ) (Fig. 5E). Interestingly, at 30 hours, TgEFP1-KO clones 1 and 2  
426 had a significantly higher percentage of vacuoles with one parasite ( $32.71\% \pm 5.28$  and  
427  $46.12\% \pm 9.62$ , respectively), in comparison to that of both RHDKu80 and TgEFP1-HA  
428 parasites ( $9.77\% \pm 3.50$  and  $18.20 \pm 3.96$ , respectively) (Fig. 5E). An increase in the  
429 number of vacuoles with just one parasite would indicate that for the KO strains, the  
430 parasites are exiting the cell earlier and re-entering cells. Altogether, this showed that  
431 TgEFP1-KO clones 1 and 2 have a shorter intracellular division cycle in comparison to  
432 TgEFP1-HA parasites.

### 433 **3.6. Mutating the signal peptide or EF-hands disrupts the localization pattern of** 434 **TgEFP1**

435 To test the role of various domains of TgEFP1 on its localization and function, we  
436 used a complementation approach in which we introduced either the wild-type or mutant  
437 versions of TgEFP1 into the TgEFP1-KO strains. Unfortunately, the way we created the  
438 KO strains used up the best selectable markers available and made complementation  
439 challenging. Accordingly, we created a new KO in the RH $\Delta$ Ku80 strain using the same  
440 CRISPR/Cas9 strategies and constructs as before. PCR analysis of TgEFP1-KO clone A  
441 showed correct insertion of the HXGPRT selectable marker at the endogenous *TgEFP1*  
442 locus (Fig. 6A). Complemented strains of the TgEFP1-KO Clone A were generated by  
443 introducing an ectopic copy of TgEFP1-HA under its endogenous promoter along with a  
444 DHFR selectable marker at the *Ku80* locus. Complementation was done with either wild-  
445 type (TgEFP1 WT), signal peptide truncation (TgEFP1 SP Del), or mutant copies  
446 containing point mutations from an aspartate residue at position 97 (TgEFP1 D97A) or  
447 129 (TgEFP1 D129A) to an alanine (Fig. 6B). The purpose of complementing with  
448 TgEFP1 SP truncation is to understand the function of the signal peptide in the localization  
449 of the protein to the PLV/ELC and/or the PV. The purpose of complementing with point  
450 mutations at key residues within the EF-hand domains is to understand if the proteins  
451 predicted ability to bind calcium influences the localization of the protein. IFA analysis  
452 showed that TgEFP1-KO clone A parasites complemented with TgEFP1 WT-HA showed  
453 a similar localization pattern as that of endogenously tagged proteins at the PLV/ELC and  
454 the PV (Fig. 6C, left column). In contrast, TgEFP1-KO clone A parasites complemented  
455 with TgEFP1 SP Del-HA showed a localization pattern that was cytosolic puncta (Fig. 6C,

456 second column). Interestingly, TgEFP1-KO clone A parasites complemented with either  
457 TgEFP1 D97A-HA or TgEFP1 D129A-HA showed a localization pattern that was  
458 exclusively in the PV (Figure 6C, third and right column). Acetylated tubulin staining  
459 showed that all representative vacuoles are non-dividing and outlined the cell body of the  
460 parasite to allow for differentiation of localization patterns that are intra-parasitic versus  
461 extra-parasitic (Fig. 6C, mid and bottom row).

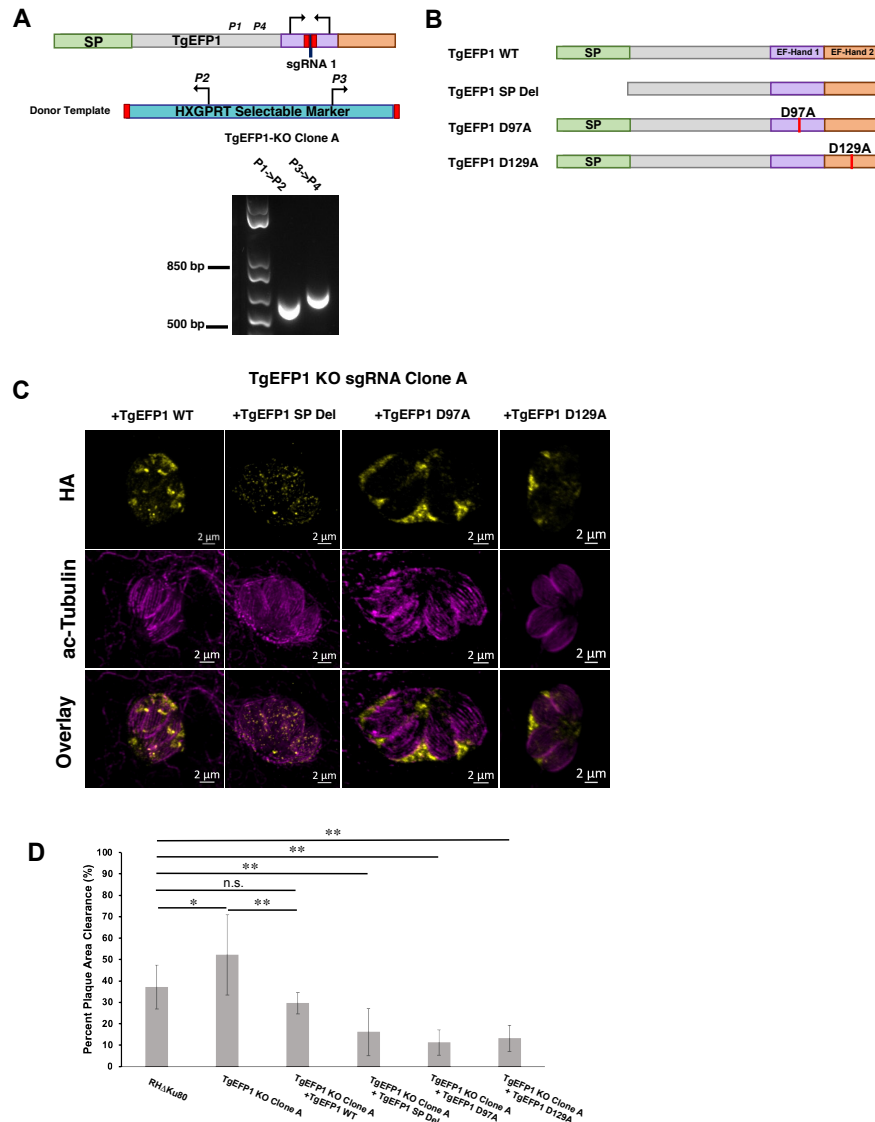

462 **Figure 6. Role of TgEFP1 domains in localization and function.** (A) Diagram of CRISPR/Cas9 strategy  
 463 to generate TgEFP1-KO parasites in RHΔKu80. The sgRNA used was designed to target the first EF-hand  
 464 domain (purple box). P1-4 indicates the position and direction of the primers used to confirm the integration  
 465 of the donor template. Shown below diagram is the result of the PCR analysis of genomic DNA from  
 466 TgEFP1-KO clone A using primer ss1 and 2 or primer 3 and 4. (B) Diagrams of versions of TgEFP1-HA  
 467 used to complement the knockout strain. Wild-type TgEFP1-HA is shown on top. Amino acids 1 to 28 were  
 468 deleted to generate the signal peptide deletion (SP Del) mutant. To disrupt the EF-hands, either the aspartic  
 469 acid (D) at position 97 within EF-hand 1 or at position 129 within EF-hand 2 were mutated to alanine (A) to  
 470 generate the D97A and D129A mutants. (C) IFA of intracellular parasites of the TgEFP1 KO Clone A strain  
 471 complemented with either wild-type (+TgEFP1 WT), signal peptide deletion (+TgEFP1 SP Del), D97A  
 472 (+TgEFP1 D97A), or D129A (+TgEFP1 D129A). TgEFP1 KO clone A parasites complemented TgEFP1  
 473 WT shows TgEFP1-HA (yellow) localization at the PLV and PV. TgEFP1 KO clone A parasites complemented  
 474 with TgEFP1 SP Del shows TgEFP1-HA (HA; yellow) localized at intracellular puncta.  
 475 TgEFP1 KO clone A parasites complemented with TgEFP1 D97A or D129A localized exclusively to the PV.  
 476 All samples were co-stained with acetylated-tubulin (ac-tubulin; magenta) to ensure all representative  
 477 images were of non-dividing parasites and to differentiate intra- and extracellular compartments. (D) Plaque  
 478 assay of the parental RHΔKu80, TgEFP1 KO clone A, and all complement cell lines. Scale bar = 2 μm.  
 479 \*p<0.05 and \*\*p<0.01 based on ANOVA followed by *post-hoc* Student t-tests.

480           Importantly, the new knockout clone TgEFP1 KO clone A showed the same plaquing  
481 phenotype as KO clones 1 and 2 (Fig. 6D). TgEFP1 KO Clone A had a significantly higher  
482 average percentage of plaque area clearance in comparison to that of the parental strain  
483 ( $52.10\% \pm 18.73$  vs.  $37.13\% \pm 10.24$ ). This phenotype was complemented by the  
484 introduction of a wild-type copy of TgEFP1 ( $29.57\% \pm 5.00$ , Fig. 6D). Indeed, there was  
485 no significant difference between the plaquing efficiency of the parental strain and  
486 complemented strain (Fig. 6D). Interestingly, the three strains complemented with mutant  
487 versions of TgEFP1 propagate at a significantly lower rate than the knockout strain, which  
488 would suggest complementation of the mutant phenotype (Fig. 6D). Nonetheless, these  
489 three mutant-complemented strains are significantly less efficient at forming plaques than  
490 both the parental strain and the WT complemented strain. Thus, it is plausible that by  
491 being mislocalized and/or non-functional, these mutant versions of TgEFP1 are imparting  
492 a dominant-negative effect.

## 493 4. DISCUSSION

494 Calcium, one of the most pervasive second messengers, regulates vital cellular  
495 functions, including gene expression, protein secretion, metabolism, and apoptosis in a  
496 wide variety of cells [1]. For this reason, cells utilize several calcium homeostatic  
497 mechanisms to regulate calcium fluxes under resting and non-resting conditions [1].  
498 These mechanisms include activation of calcium-sensing and/or conducting proteins,  
499 which leads to release or uptake of calcium by major calcium reservoirs within the cell or  
500 from the extracellular environment [1]. Furthermore, calcium-binding proteins can act as  
501 buffers to regulate the duration of calcium fluxes.

502 Out of all the calcium-binding proteins, EF-hand domain-containing ones are the  
503 most abundant [27]. The structural composition of EF-hand domains consists of a  $\text{Ca}^{2+}$ -  
504 coordinating loop that is flanked by two alpha-helices [1,28]. Specifically, the  $\text{Ca}^{2+}$ -  
505 coordinating loop comprises 5-7 ligands, which are primarily carboxylate groups arranged  
506 in a pentagonal bipyramid [28]. Most frequently, two EF-hand domains are paired to form  
507 the functional calcium-binding unit [29]. EF-hand domains are categorized as either  
508 canonical or pseudo domains [29]. Canonical EF-hand domains consist of pairs of EF-  
509 hand motifs that work in concert to coordinate calcium-binding through carboxylate  
510 groups of the residues that comprise them. In contrast, pseudo-EF-hand domains consist  
511 of a single and/or an odd number of EF-hand motifs that bind calcium through backbone  
512 carbonyl groups [28]. Due to the difference in structures between these two classes of EF-  
513 hand domains, there is a difference in calcium-binding affinities [1,29]. Specifically,  
514 canonical EF-hand domains have a relatively higher calcium-binding affinity than that of  
515 pseudo-EF-hand domains [1,29]. This leads to two main functional classes of EF-hand

516 domain-containing proteins: calcium-sensing, which are mostly comprised of pseudo-EF-  
517 hand domains, and calcium buffering proteins, which are mostly comprised of canonical  
518 EF-hand domains [1,29]. Furthermore, calcium buffering EF-hand domain-containing  
519 proteins exhibit limited conformational changes upon calcium binding, whereas calcium-  
520 sensing EF-hand domain-containing proteins exhibit large conformational changes upon  
521 calcium binding to allow for interacting proteins to bind [29]. For these reasons, calcium  
522 buffering EF-hand domain-containing proteins primarily play a role in modulating the  
523 duration of calcium signaling and maintaining calcium homeostasis, while calcium-  
524 sensing EF-hand domain proteins primarily respond to physiological changes in calcium  
525 [1].

526         Just as in mammalian and plant cells, calcium also plays a key role in regulating  
527 the growth cycle of the eukaryotic human pathogen *Toxoplasma gondii* [3]. Not  
528 surprisingly, *Toxoplasma* encodes numerous proteins containing EF-hand domains.  
529 Previous studies have identified 68 EF-hand domain-containing proteins within the  
530 *Toxoplasma* genome, of which 8 contain transmembrane domains [30]. Among the most  
531 studied EF-hand proteins in *Toxoplasma* are the calcium-dependent protein kinases  
532 (CDPKs). CDPKs, which are unique to plants and some protozoan parasites and absent  
533 in mammalian cells, contain a serine/threonine kinase domain and a calmodulin-like  
534 domain linked by an autoinhibitory junction domain [31]. In *Toxoplasma*, CDPKs have  
535 been implicated in a diversity of functions, including secretion, motility, invasion, egress,  
536 and parasite division [32-34]. Other categories of EF-hand domain-containing proteins  
537 characterized in *Toxoplasma* fall into the functional categories of calmodulin (CaM), CaM-  
538 like, centrins, calcatrins, and calcineurin proteins [3]. Given the great diversity of functions



539 imparted by EF-hand proteins and the importance of calcium signaling in this parasite,  
540 there is a need to characterize a broader range of EF-hand domain-containing proteins.

541 We have now identified and characterized TgEFP1, which, based on *in silico*  
542 analysis of its primary and secondary structure, has a predicted N-terminal signal peptide  
543 and two EF-hand domains located at the C-terminus of the protein (Fig. 1A). In-depth  
544 analysis of the Ca<sup>2+</sup> coordinating residues shows that the EF-hand domains contain 12  
545 of them, including two aspartic acid residues at positions 97 and 129, suggesting that  
546 TgEFP1 contains canonical EF-hand domains. For this reason, it is predicted that  
547 TgEFP1 acts as a calcium buffering protein and may play a role in modulating the duration  
548 of calcium fluxes and maintaining calcium homeostasis in the parasite. Furthermore, no  
549 transmembrane domains and/or post-translational modification were predicted that would  
550 suggest the protein was membrane-associated. Therefore, TgEFP1 would be the first  
551 identified luminal protein of the PLV/ELC.

552 Interestingly, TgEFP1 can be detected both in the PLV/ELC and within the  
553 parasitophorous vacuole (PV). To our knowledge, this is the first report of a *Toxoplasma*  
554 protein that localizes to both the PLV/ELC and the PV, suggesting a crosstalk between  
555 these two organelles. Previous studies have identified crosstalk between the endocytic  
556 and exocytic system, where the VAC played a key role in the export and import of proteins  
557 from the PV and host cell to the parasite cell body [35]. Since the VAC and other  
558 compartments of the endo-lysosomal system, including the PLV/ECL, can fuse in  
559 extracellular parasites. It is possible that there is an exchange of contents between all of  
560 these compartments. Thus, the dual localization of TgEFP1 may be attributed to  
561 interactions between *Toxoplasma's* endocytic and exocytic systems.

562 Lack of TgEFP1 results in disruption of the normal propagation of the parasite as  
563 well as an altered sensitivity to calcium ionophores. These phenotypes would suggest  
564 that TgEFP1 plays a role in calcium-dependent processes and/or homeostasis. As  
565 TgEFP1 is in both the PV and the PLV/ELC, a question arises as to in which of those two  
566 locations is TgEFP1's function being imparted. Interestingly, the phenotypic defects  
567 observed in the TgEFP1 knockout parasites parallel those of parasites lacking the PV  
568 localized dense granule protein GRA41 [12]. GRA41 is a dense granule protein that is  
569 secreted into the PV, and loss of GRA41 leads to defects in calcium regulation and timing  
570 of egress [12]. The fact that loss of either GRA41 or TgEFP1 results in premature egress  
571 might suggest that events at the PV might act as a hub for regulation of parasite exit and  
572 a plausible locale for TgEFP1's function.

573 Nonetheless, it is also plausible that TgEFP1 acts within the PLV/ELC. Lysosomes,  
574 endosomal vesicles, peroxisomes, and secretory vesicles can function in calcium release  
575 to induce signaling that regulates localized cellular functions, including protein transport,  
576 protein secretion, and vesicle fusion [36]. Unique to plant cells are EF-hand domain  
577 proteins that localize to the plant vacuole [37,38]. The EF-hand domain proteins that are  
578 specific to plant vacuoles play a key role in mediating calcium signaling that is implicated  
579 in osmoregulation under stress conditions, including drought, cold, and salt stress [37].  
580 Furthermore, plant EF-hand domain-containing proteins regulate calcium signaling, which  
581 is vital to plant adaptive behavior [37]. Lastly, the plant vacuole has been shown to be a  
582 major calcium reservoir within plant cells, where the entry and release of calcium are  
583 regulated by the EF-hand domain-containing proteins that localize to the plant vacuole  
584 [37,38]. Therefore, the PLV/VAC may also play a role as a calcium reservoir in the parasite,

585 and TgEFP1 may play an important in adaptive behaviors and osmoregulation in the  
586 parasite.

587 To start addressing the relation between function and localization for TgEFP1, we  
588 investigated the consequence of mutating the signal peptide. Unfortunately, this mutant  
589 protein was not localized to either the PLV or the PV and appeared to cause a dominant  
590 negative effect. Interestingly, when we mutated either of the EF-hand domains, TgEFP1  
591 was only present in the PV. This suggests that the binding of calcium by both EF-hand  
592 domains is necessary for the localization of the protein to the PLV/ELC. Therefore, we  
593 speculate that TgEFP1 is initially secreted to the PV, and upon binding to calcium, it is  
594 internalized to the PLV/ELC as a mechanism to regulate calcium homeostasis within the  
595 parasite. This model is consistent with our observations that TgEFP1-HA transport to the  
596 PV is Golgi-dependent, while transport to the PLV/ELC is not. Furthermore, the endocytic  
597 and exocytic systems of the parasite are known to converge at endosomal compartments  
598 to regulate the import and export of proteins from the parasite cell body [35]. Thus, through  
599 the function of TgEFP1, the PV and the endosomal compartments might be collaborating  
600 in regulating calcium homeostasis and facilitating calcium signaling.

601 In terms of function, TgEFP1 may act as a calcium buffer that actively regulates  
602 levels of calcium within the PV, parasite cytosol, and the PLV/ELC. Specifically, TgEFP1  
603 may initially be transported to the PV, where it binds to excess calcium. Upon binding to  
604 calcium, the protein is internalized through the function of the PLV/ELC. The calcium is  
605 then retained in the PLV/ELC to also regulate calcium levels within the parasite cytosol.  
606 Future directions will be to identify and characterize TgEFP1 interactors that also localize  
607 to the PLV/ELC to gain a better understanding of its function in the parasite. Lastly,

608 calcium studies, including the use of live calcium indicators, could determine the  
609 functional relevance of TgEFP1 indirectly regulating calcium fluxes within the parasite  
610 cytosol and the PV during the lytic cycle of the parasite.

611 **ACKNOWLEDGMENTS**

612 We would like to thank Dr. Sabrina Absalon and Dr. Benjamin Liffner for their  
613 assistance with the expansion microscopy experiments. This research was supported by  
614 the National Institute of Health grants R01AI123457, R01AI149766, RO1AI89808, and  
615 R21AI124067 to GA. ND was funded by a pre-doctoral fellowship from the American  
616 Heart Association (834981).

617

## 618 REFERENCES

- 619 1. Bagur, R.; Hajnóczky, G. Intracellular Ca. *Mol Cell* **2017**, *66*, 780-788,  
620 doi:10.1016/j.molcel.2017.05.028.
- 621 2. Prins, D.; Michalak, M. Organellar calcium buffers. *Cold Spring Harb Perspect Biol* **2011**, *3*,  
622 doi:10.1101/cshperspect.a004069.
- 623 3. Hortua Triana, M.A.; Márquez-Nogueras, K.M.; Vella, S.A.; Moreno, S.N.J. Calcium  
624 signaling and the lytic cycle of the Apicomplexan parasite *Toxoplasma gondii*. *Biochim*  
625 *Biophys Acta Mol Cell Res* **2018**, *1865*, 1846-1856, doi:10.1016/j.bbamcr.2018.08.004.
- 626 4. Robert-Gangneux, F.; Dardé, M.L. Epidemiology of and diagnostic strategies for  
627 toxoplasmosis. *Clin Microbiol Rev* **2012**, *25*, 264-296, doi:10.1128/CMR.05013-11.
- 628 5. Montoya, J.G.; Rosso, F. Diagnosis and management of toxoplasmosis. *Clin Perinatol* **2005**,  
629 *32*, 705-726, doi:10.1016/j.clp.2005.04.011.
- 630 6. Borges-Pereira, L.; Budu, A.; McKnight, C.A.; Moore, C.A.; Vella, S.A.; Hortua Triana, M.A.;  
631 Liu, J.; Garcia, C.R.; Pace, D.A.; Moreno, S.N. Calcium Signaling throughout the *Toxoplasma*  
632 *gondii* Lytic Cycle: A STUDY USING GENETICALLY ENCODED CALCIUM INDICATORS. *J Biol*  
633 *Chem* **2015**, *290*, 26914-26926, doi:10.1074/jbc.M115.652511.
- 634 7. Pace, D.A.; McKnight, C.A.; Liu, J.; Jimenez, V.; Moreno, S.N. Calcium entry in *Toxoplasma*  
635 *gondii* and its enhancing effect of invasion-linked traits. *J Biol Chem* **2014**, *289*, 19637-  
636 19647, doi:10.1074/jbc.M114.565390.
- 637 8. Smith, J.E. A ubiquitous intracellular parasite: the cellular biology of *Toxoplasma gondii*.  
638 *Int J Parasitol* **1995**, *25*, 1301-1309, doi:10.1016/0020-7519(95)00067-c.
- 639 9. Francia, M.E.; Wicher, S.; Pace, D.A.; Sullivan, J.; Moreno, S.N.; Arrizabalaga, G. A  
640 *Toxoplasma gondii* protein with homology to intracellular type Na<sup>+</sup>/H<sup>+</sup> exchangers is  
641 important for osmoregulation and invasion. *Exp Cell Res* **2011**, *317*, 1382-1396,  
642 doi:10.1016/j.yexcr.2011.03.020.
- 643 10. Liu, J.; Pace, D.; Dou, Z.; King, T.P.; Guidot, D.; Li, Z.H.; Carruthers, V.B.; Moreno, S.N. A  
644 vacuolar-H(+) -pyrophosphatase (TgVP1) is required for microneme secretion, host cell  
645 invasion, and extracellular survival of *Toxoplasma gondii*. *Mol Microbiol* **2014**, *93*, 698-  
646 712, doi:10.1111/mmi.12685.
- 647 11. Miranda, K.; Pace, D.A.; Cintron, R.; Rodrigues, J.C.; Fang, J.; Smith, A.; Rohloff, P.; Coelho,  
648 E.; de Haas, F.; de Souza, W.; et al. Characterization of a novel organelle in *Toxoplasma*  
649 *gondii* with similar composition and function to the plant vacuole. *Mol Microbiol* **2010**,  
650 *76*, 1358-1375, doi:10.1111/j.1365-2958.2010.07165.x.
- 651 12. LaFavers, K.A.; Márquez-Nogueras, K.M.; Coppens, I.; Moreno, S.N.J.; Arrizabalaga, G. A  
652 novel dense granule protein, GRA41, regulates timing of egress and calcium sensitivity in  
653 *Toxoplasma gondii*. *Cell Microbiol* **2017**, *19*, doi:10.1111/cmi.12749.
- 654 13. Shen, B.; Brown, K.; Long, S.; Sibley, L.D. Development of CRISPR/Cas9 for Efficient  
655 Genome Editing in *Toxoplasma gondii*. *Methods Mol Biol* **2017**, *1498*, 79-103,  
656 doi:10.1007/978-1-4939-6472-7\_6.
- 657 14. Long, S.; Brown, K.M.; Sibley, L.D. CRISPR-mediated Tagging with BirA Allows Proximity  
658 Labeling in. *Bio Protoc* **2018**, *8*, doi:10.21769/BioProtoc.2768.

- 659 15. Yang, C.; Broncel, M.; Dominicus, C.; Sampson, E.; Blakely, W.J.; Treeck, M.; Arrizabalaga,  
660 G. A plasma membrane localized protein phosphatase in *Toxoplasma gondii*, PPM5C,  
661 regulates attachment to host cells. *Sci Rep* **2019**, *9*, 5924, doi:10.1038/s41598-019-42441-  
662 1.
- 663 16. Blakely, W.J.; Holmes, M.J.; Arrizabalaga, G. The Secreted Acid Phosphatase Domain-  
664 Containing GRA44 from *Toxoplasma gondii* Is Required for c-Myc Induction in Infected  
665 Cells. *mSphere* **2020**, *5*, doi:10.1128/mSphere.00877-19.
- 666 17. Jacobs, K.; Charvat, R.; Arrizabalaga, G. Identification of Fis1 Interactors in *Toxoplasma*  
667 *gondii* Reveals a Novel Protein Required for Peripheral Distribution of the Mitochondrion.  
668 *mBio* **2020**, *11*, doi:10.1128/mBio.02732-19.
- 669 18. Liffner, B.; Absalon, S. Expansion Microscopy Reveals. *Microorganisms* **2021**, *9*,  
670 doi:10.3390/microorganisms9112306.
- 671 19. Heredero-Bermejo, I.; Varberg, J.M.; Charvat, R.; Jacobs, K.; Garbuz, T.; Sullivan, W.J.;  
672 Arrizabalaga, G. TgDrpC, an atypical dynamin-related protein in *Toxoplasma gondii*, is  
673 associated with vesicular transport factors and parasite division. *Mol Microbiol* **2019**, *111*,  
674 46-64, doi:10.1111/mmi.14138.
- 675 20. Guzman, C.; Bagga, M.; Kaur, A.; Westermarck, J.; Abankwa, D. ColonyArea: an ImageJ  
676 plugin to automatically quantify colony formation in clonogenic assays. *PLOS ONE* **2014**,  
677 *9*, e92444, doi:10.1371/journal.pone.0092444.
- 678 21. Vakili, O.; Khatami, S.H.; Maleksabet, A.; Movahedpour, A.; Fana, S.E.; Sadegh, R.;  
679 Salmanzadeh, A.H.; Razeghifam, H.; Nourdideh, S.; Tehrani, S.S.; et al. Finding Appropriate  
680 Signal Peptides for Secretory Production of Recombinant Glucarpidase: An In  
681 Silico Method. *Recent Pat Biotechnol* **2021**, *15*, 302-315,  
682 doi:10.2174/1872208315666210921095420.
- 683 22. de Castro, E.; Sigrist, C.J.; Gattiker, A.; Bulliard, V.; Langendijk-Genevaux, P.S.; Gasteiger,  
684 E.; Bairoch, A.; Hulo, N. ScanProsite: detection of PROSITE signature matches and ProRule-  
685 associated functional and structural residues in proteins. *Nucleic Acids Res* **2006**, *34*,  
686 W362-365, doi:10.1093/nar/gkl124.
- 687 23. Sigrist, C.J.; Cerutti, L.; Hulo, N.; Gattiker, A.; Falquet, L.; Pagni, M.; Bairoch, A.; Bucher, P.  
688 PROSITE: a documented database using patterns and profiles as motif descriptors. *Brief*  
689 *Bioinform* **2002**, *3*, 265-274, doi:10.1093/bib/3.3.265.
- 690 24. Huang, R.; Que, X.; Hirata, K.; Brinen, L.S.; Lee, J.H.; Hansell, E.; Engel, J.; Sajid, M.; Reed,  
691 S. The cathepsin L of *Toxoplasma gondii* (TgCPL) and its endogenous macromolecular  
692 inhibitor, toxostatin. *Mol Biochem Parasitol* **2009**, *164*, 86-94.
- 693 25. Nishi, M.; Hu, K.; Murray, J.M.; Roos, D.S. Organellar dynamics during the cell cycle of  
694 *Toxoplasma gondii*. *J Cell Sci* **2008**, *121*, 1559-1568, doi:10.1242/jcs.021089.
- 695 26. Carmelle, R.; Schiano Lomoriello, P.; Devarakonda, P.M.; Kellermeier, J.A.; Heaslip, A.T.  
696 Actin and an unconventional myosin motor, TgMyoF, control the organization and  
697 dynamics of the endomembrane network in *Toxoplasma gondii*. *PLoS Pathog* **2021**, *17*,  
698 e1008787, doi:10.1371/journal.ppat.1008787.
- 699 27. Halling, D.B.; Liebeskind, B.J.; Hall, A.W.; Aldrich, R.W. Conserved properties of individual  
700 Ca<sup>2+</sup>-binding sites in calmodulin. *Proc Natl Acad Sci U S A* **2016**, *113*, E1216-1225,  
701 doi:10.1073/pnas.1600385113.

- 702 28. Strynadka, N.C.; James, M.N. Crystal structures of the helix-loop-helix calcium-binding  
703 proteins. *Annu Rev Biochem* **1989**, *58*, 951-998,  
704 doi:10.1146/annurev.bi.58.070189.004511.
- 705 29. Schwaller, B. Cytosolic Ca<sup>2+</sup> buffers. *Cold Spring Harb Perspect Biol* **2010**, *2*, a004051,  
706 doi:10.1101/cshperspect.a004051.
- 707 30. Chang, L.; Dykes, E.J.; Li, J.; Moreno, S.N.J.; Hortua Triana, M.A. Characterization of Two  
708 EF-hand Domain-containing Proteins from *Toxoplasma gondii*. *J Eukaryot Microbiol* **2019**,  
709 *66*, 343-353, doi:10.1111/jeu.12675.
- 710 31. Asai, S.; Ichikawa, T.; Nomura, H.; Kobayashi, M.; Kamiyoshihara, Y.; Mori, H.; Kadota, Y.;  
711 Zipfel, C.; Jones, J.D.G.; Yoshioka, H. The variable domain of a plant calcium-dependent  
712 protein kinase (CDPK) confers subcellular localization and substrate recognition for  
713 NADPH oxidase. *J Biol Chem* **2013**, *288*, 14332-14340, doi:10.1074/jbc.M112.448910.
- 714 32. Cardew, E.M.; Verlinde, C.L.M.J.; Pohl, E. The calcium-dependent protein kinase 1 from  
715 *Toxoplasma gondii* as target for structure-based drug design. *Parasitology* **2018**, *145*, 210-  
716 218, doi:10.1017/S0031182017001901.
- 717 33. Gaji, R.Y.; Johnson, D.E.; Treeck, M.; Wang, M.; Hudmon, A.; Arrizabalaga, G.  
718 Phosphorylation of a Myosin Motor by TgCDPK3 Facilitates Rapid Initiation of Motility  
719 during *Toxoplasma gondii* egress. *PLoS Pathog* **2015**, *11*, e1005268,  
720 doi:10.1371/journal.ppat.1005268.
- 721 34. McCoy, J.M.; Whitehead, L.; van Dooren, G.G.; Tonkin, C.J. TgCDPK3 regulates calcium-  
722 dependent egress of *Toxoplasma gondii* from host cells. *PLoS Pathog* **2012**, *8*, e1003066,  
723 doi:10.1371/journal.ppat.1003066.
- 724 35. McGovern, O.L.; Rivera-Cuevas, Y.; Kannan, G.; Narwold, A.J.; Carruthers, V.B. Intersection  
725 of endocytic and exocytic systems in *Toxoplasma gondii*. *Traffic* **2018**, *19*, 336-353,  
726 doi:10.1111/tra.12556.
- 727 36. Yang, J.; Zhao, Z.; Gu, M.; Feng, X.; Xu, H. Release and uptake mechanisms of vesicular Ca.  
728 *Protein Cell* **2019**, *10*, 8-19, doi:10.1007/s13238-018-0523-x.
- 729 37. Mohanta, T.K.; Yadav, D.; Khan, A.L.; Hashem, A.; Abd Allah, E.F.; Al-Harrasi, A. Molecular  
730 Players of EF-hand Containing Calcium Signaling Event in Plants. *Int J Mol Sci* **2019**, *20*,  
731 doi:10.3390/ijms20061476.
- 732 38. Day, I.S.; Reddy, V.S.; Shad Ali, G.; Reddy, A.S. Analysis of EF-hand-containing proteins in  
733 *Arabidopsis*. *Genome Biol* **2002**, *3*, RESEARCH0056, doi:10.1186/gb-2002-3-10-  
734 research0056.

735

736



737 **SUPPLEMENTAL MATERIALS**

738 Supplemental Table S1. Primers used in this study.

| Purpose                                                | Name                  | Sequence                                                            |
|--------------------------------------------------------|-----------------------|---------------------------------------------------------------------|
| Generate vector to tag endogenous TgEFP1               | EFP1HA forward        | cccccgcgcttctgccaccaagctcgccaggctgt                                 |
|                                                        | EFP1HA reverse        | accgttctcgccagttcacCAtCctgcaaGtgcataagaaggaa                        |
| Generate pSag1-Cas9-U6-sg1EFP1 by using Q5 mutagenesis | EFP1SG1 forward       | ccaacggagagtttagagctagaaatagc                                       |
|                                                        | EFP1SG1 reverse       | agtcgaaactcaactgacatccccatttac                                      |
| Amplifying donor template for knockout clone 1         | DonorKO1 forward      | ggacgaagacgacgaggcctcatccgaggaattcatggaacaa<br>aagttgatttctgaagaag  |
|                                                        | DonorKO1 reverse      | tgcttcttctcctctgtgttctgcttttgacgcctagcgaagatccgat<br>cttg           |
| Generate pSag1-Cas9-U6-sg2EFP1 by using Q5 mutagenesis | EFP1SG2 forward       | ttccggctaggttttagagctagaaatagc                                      |
|                                                        | EFP1SG2 reverse       | gaaagaaaacaactgacatccccatttac                                       |
| Amplifying donor template for knockout clone 1         | DonorKO2 forward      | aggtccgagtgacgcatcccgaatcggaacagcgaactgaacaa<br>aagttgatttctgaagaag |
|                                                        | DonorKO2 reverse      | cgatattctcgagagtcaagagtccatcttggttgagtgccgaagat<br>ccgatctg         |
| Amplifying TgEFP1 gDNA to make complementing construct | TgEFP1comp WT forward | ggaggacgggaattcaaggagatggggacggcg                                   |
|                                                        | TgEFP1comp WT reverse | gttccctaggaattcaatagctgatgatacactcgcgatatt                          |
| Deleting signal peptide from complementing construct   | $\Delta$ SP forward   | ccaccatgttcgcgcgctggcgtcg                                           |
|                                                        | $\Delta$ SP reverse   | gcggaacatggtggcaggaagcgc                                            |
| Generation of D97A complementation construct using Q5  | D97A forward          | catggagtacgcatccaacggag                                             |
|                                                        | D97A reverse          | aattcctcgcgatgaag                                                   |
|                                                        | D129A forward         | ccggctagtggcatccaaccaag                                             |

|                                                        |               |                                                                         |
|--------------------------------------------------------|---------------|-------------------------------------------------------------------------|
| Generation of D129A complementation construct using Q5 | D129A reverse | aagaaagaaaacagttcgc                                                     |
| Targeting complementing template to Ku80 locus         | KU80 forward  | gtccccggttcgcctcagcacacacacacatgacgtacatcgagga<br>acaaaagctgggtac       |
|                                                        | KU80 reverse  | ggatagctccattgttctgatgggaactattccgacattacattcatcctg<br>caagtcatagaaggaa |

739
